# Supplementary material for: Imidazolium functionalized cobalt tris(bipyridyl) complex redox shuttles for high efficiency ionic liquid electrolyte dye-sensitized solar cells
Source: Royal Society of Chemistry journal article supplement (doi:10.1039/c3ta12031g), 2013-01-01
Supplement: c3ta12031g.pdf [file c3ta12031g.pdf]

## Electronic Supplementary Information

### Imidazolium Functionalized Cobalt Tris(bipyridyl) Complex Redox Shuttles for High Efficient Ionic Liquid Electrolyte Dye-Sensitized Solar Cells

Dan Xu, Haigang Zhang, Xiaojian Chen, Feng Yan\*

*Jiangsu Key Laboratory of Advanced Functional Polymer Design and Application, Department of Polymer Science and Engineering, College of Chemistry, Chemical Engineering and Materials Science; Soochow University, Suzhou, 215123, China. Email: [fyan@suda.edu.cn](mailto:fyan@suda.edu.cn)*

#### 10 Chemicals

4,4'-Dimethyl-2,2'-dipyridyl, potassium dichromate ( $K_2Cr_2O_7$ ), sodium borohydride ( $NaBH_4$ ), hydrobromic acid (48 wt.% solution), 1-methylimidazole, potassium hexafluorophosphate ( $KPF_6$ ), cobalt chloride, lithium perchlorate ( $LiClO_4$ ) were purchased from Alfa Aesar. 4,4'-Bis(bromomethyl)-2,2'-bipyridine was prepared according to the literature procedure.<sup>1</sup>  
15  $[Co(dmp)_3](PF_6)_2$  (dmp = 4,4'-dimethyl-2,2'-bipyridine) was synthesized follow the literature method.<sup>2</sup> 1-Ethyl-3-methylimidazolium thiocyanate (EMINCS), nitrosonium tetrafluoroborate ( $NOBF_4$ ) and 1-propyl-3-methylimidazolium iodine (PMII) were purchased from Merck.  $H_2PtCl_6$  was purchased from Aldrich. *Cis*-diisothiocyanato-bis(2,2'-bipyridyl-4,4'-dicarboxylic acid) ruthenium(II) bis(tetrabutylammonium) (N719) was purchased from Solaronix SA (Switzerland). 20-nm-sized  $TiO_2$   
20 particles was prepared according to the literature procedure by modifying the porosity to improve the mass transport of the  $[Co((MeIm-Bpy)PF_6)_3]^{2+/3+}$  redox couple.<sup>3</sup> Fluorine-doped tin oxide overlayer (FTO) glass electrodes ( $7 \Omega/Sq$ ), 200 nm-diameter light-scattering  $TiO_2$  colloidal were purchased from Dalian Hepat Chroma Solar Tech. Co., Ltd (China). All general reagents and solvents were obtained from commercial sources.

## Synthesis of the imidazolium functionalized cobalt tris(bipyridyl) complex ([Co((MeIm-Bpy)PF<sub>6</sub>)<sub>3</sub>](PF<sub>6</sub>)<sub>2</sub>)

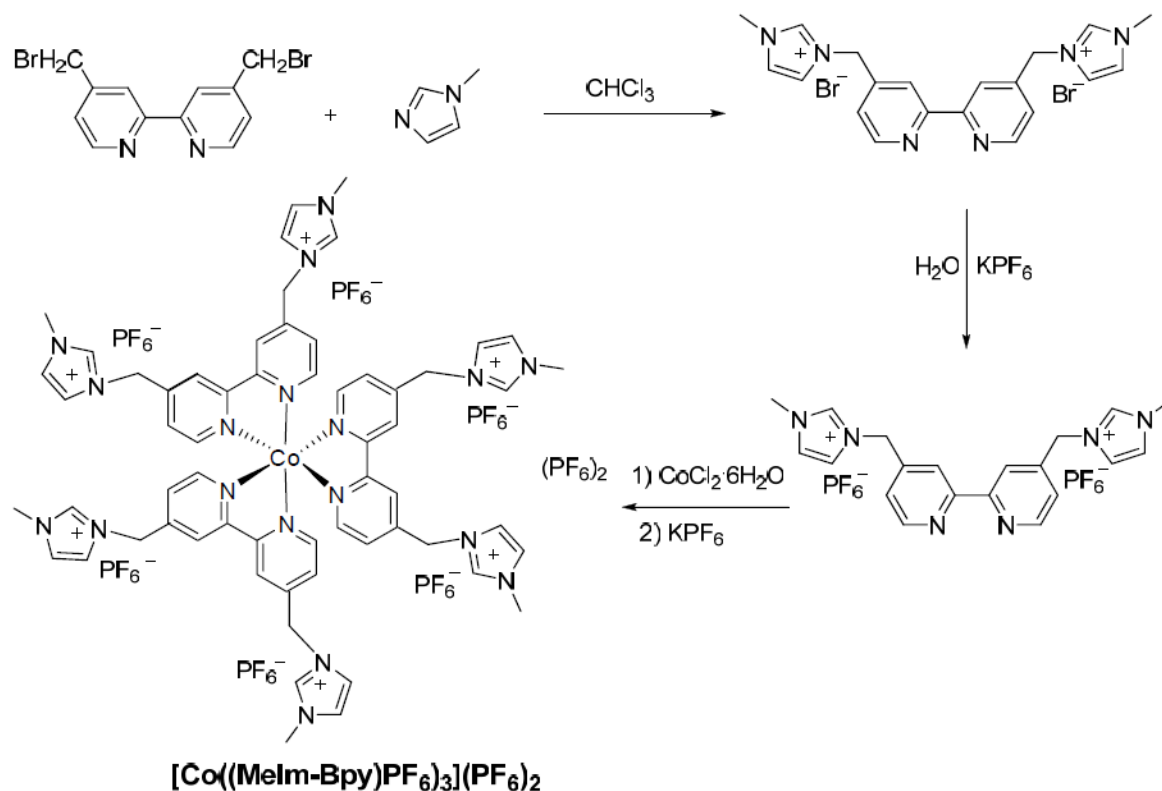

**Scheme S1.** General synthetic procedure for [Co((MeIm-Bpy)PF<sub>6</sub>)<sub>3</sub>](PF<sub>6</sub>)<sub>2</sub>.

5

### Synthesis of 3,3'-(2,2'-bipyridine-4,4'-diylbis(methylene))bis(1-methyl-1*H*-imidazol-3-ium) bromide ([MeIm-Bpy]Br)

A mixture containing 4,4'-bis(bromomethyl)-2,2'-bipyridine (2.0 g, 5.88 mmol) and 1-methylimidazole (0.97 g, 11.8 mmol) in chloroform was refluxed for 6 h and then allowed to cool  
 10 down to RT. The resulting precipitate was filtered, washed with diethyl ether and dried. <sup>1</sup>H NMR (400 MHz, D<sub>2</sub>O): δ 8.71 (s, 2H, H<sub>py</sub>), 8.33 (s, 2H, H<sub>py</sub>), 7.75 (s, 2H, H<sub>im</sub>), 7.68 (s, 2H, H<sub>im</sub>), 7.47 (s, 2H, H<sub>py</sub>), 5.65 (s, 4H, CH<sub>2</sub>), 3.99 (s, 6H, N-CH<sub>3</sub>).

### Synthesis of 3,3'-(2,2'-bipyridine-4,4'-diylbis(methylene))bis(1-methyl-1*H*-imidazol-3-ium)hexafluorophosphate ([MeIm-Bpy]PF<sub>6</sub>)

A solution of [MeIm-Bpy]Br (2.0 g, 3.96 mmol) and KPF<sub>6</sub> (1.46 g, 7.93 mmol) in water was stirred at RT for 2 h. The resulting precipitate was filtered, washed with water, and vacuum dried at 80 °C. <sup>1</sup>H NMR (400 MHz, DMSO-*d*<sub>6</sub>): δ 9.23 (s, 2H, NCHN), 8.71 (s, 2H, H<sub>py</sub>), 8.38 (s, 2H, H<sub>py</sub>), 7.83 (s, 2H, H<sub>im</sub>), 7.75 (s, 2H, H<sub>im</sub>), 7.41 (s, 2H, H<sub>py</sub>). 5.58 (s, 4H, CH<sub>2</sub>), 3.86 (s, 6H, N-CH<sub>3</sub>).

### Synthesis of Co((MeIm-Bpy)PF<sub>6</sub>)<sub>3</sub>[(PF<sub>6</sub>)<sub>2</sub>]

CoCl<sub>2</sub>·6H<sub>2</sub>O (0.22 g, 0.94 mmol) was added to the methanolic solution of [MeIm-Bpy]PF<sub>6</sub> (1.8 g, 2.83 mmol). After stirring at reflux for 2 h, excess KPF<sub>6</sub> (0.8 g) was added to form a precipitate. The precipitated complex was filtered, washed with methanol, and dried under vacuum to give a yellow solid. <sup>1</sup>H NMR (400 MHz, DMSO-*d*<sub>6</sub>): δ 9.20 (s, 6H, NCHN), 8.67-8.68 (d, 6H, H<sub>py</sub>), 8.34 (s, 6H, H<sub>py</sub>), 7.79 (s, 6H, H<sub>im</sub>), 7.71 (s, 6H, H<sub>im</sub>), 7.37-7.38 (d, 6H, H<sub>py</sub>). 5.54 (s, 12H, CH<sub>2</sub>), 3.82 (s, 18H, N-CH<sub>3</sub>).

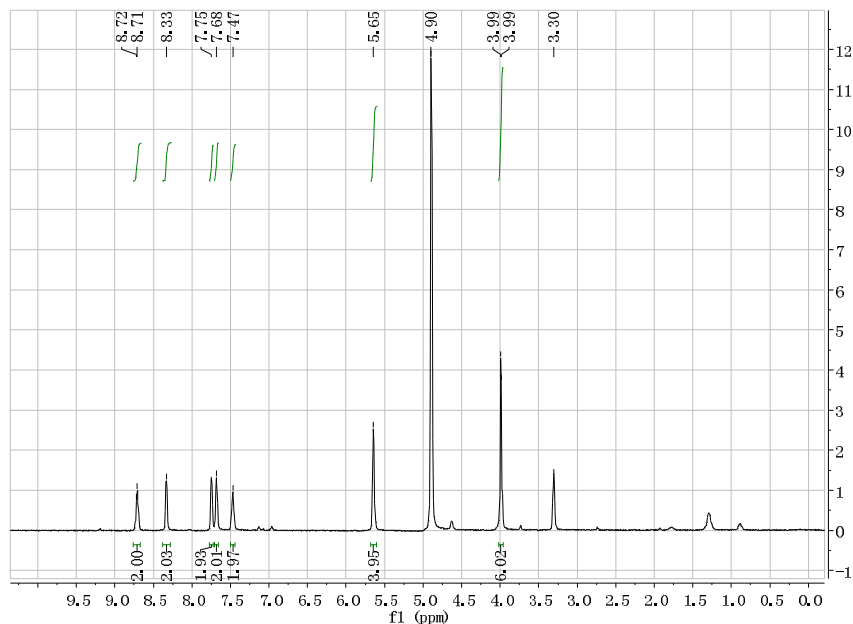

Fig. S1 <sup>1</sup>H NMR (D<sub>2</sub>O) spectrum of [MeIm-Bpy]Br.

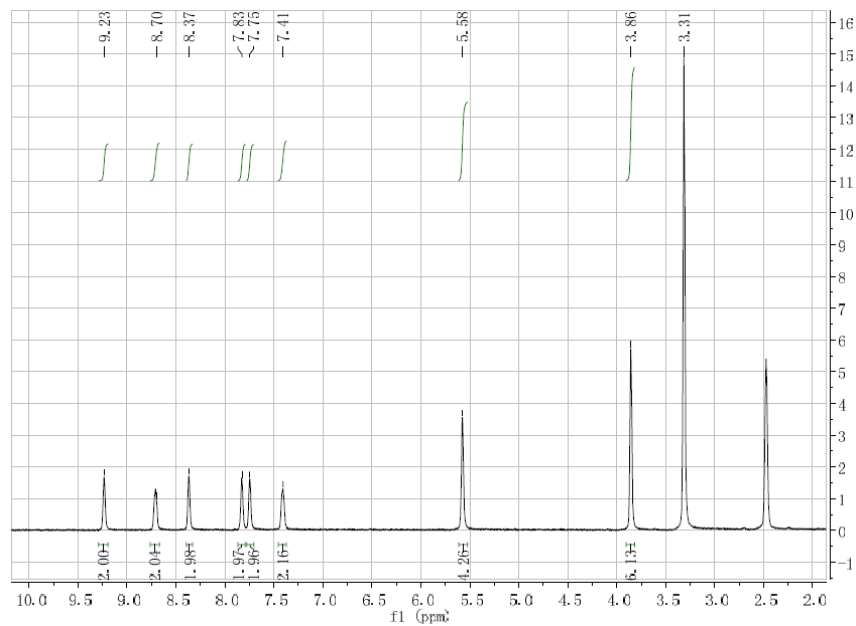

5

**Fig. S2**  $^1\text{H}$  NMR ( $\text{DMSO-}d_6$ ) spectrum of  $[\text{MeIm-Bpy}]\text{PF}_6$ .

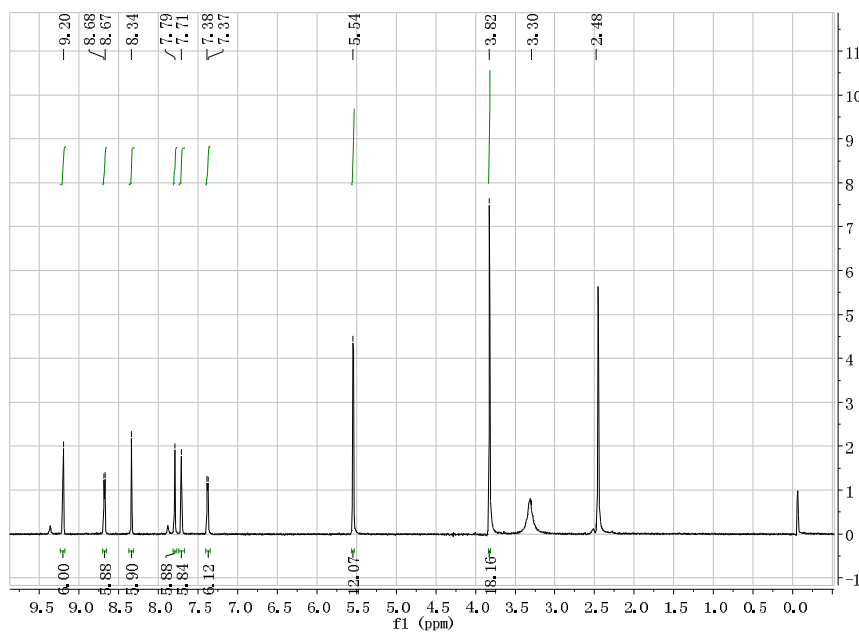

10

**Fig. S3**  $^1\text{H}$  NMR ( $\text{DMSO-}d_6$ ) spectrum of  $[\text{Co}((\text{MeIm-Bpy})\text{PF}_6)_3](\text{PF}_6)_2$ .

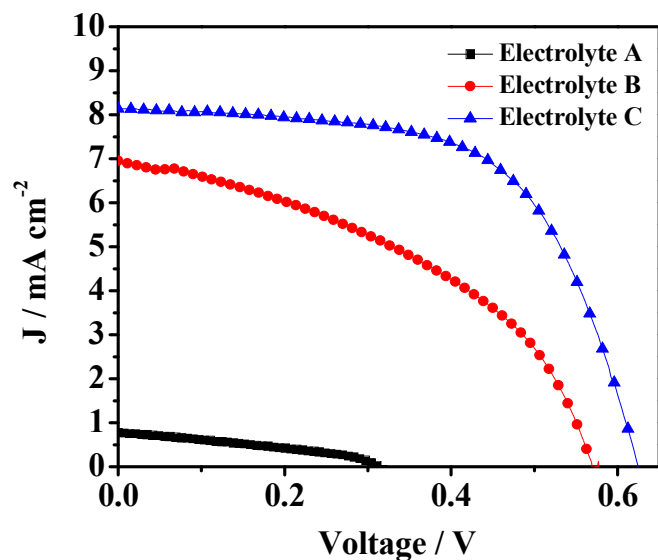

**Fig. S4** The  $J$ - $V$  curves of the DSSCs containing ionic liquid-based Electrolytes A, B and C under simulated AM 1.5 solar spectrum irradiation at  $100 \text{ mW cm}^{-2}$ .

5

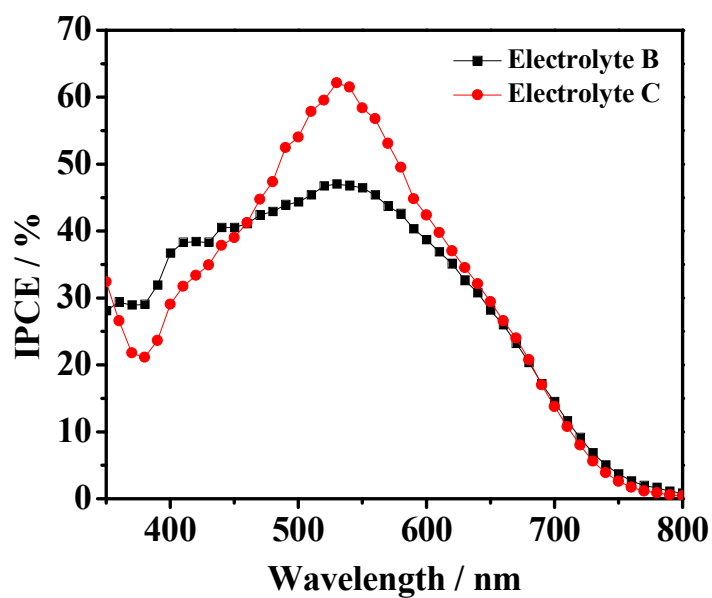

**Fig. S5** The IPCE vs. wavelength profiles for the devices based on the ionic liquid Electrolytes B and C.

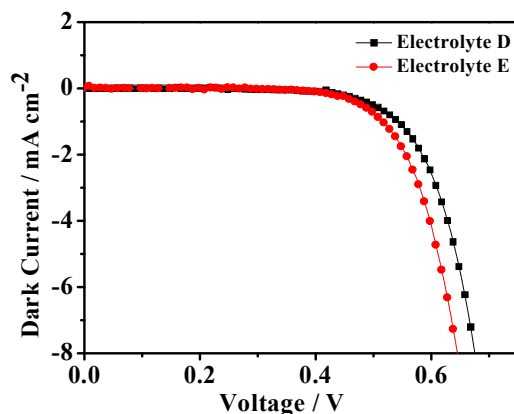

**Fig. S6** Dark current-voltage characteristics of the DSSCs based on Electrolytes D and E were tested using an aluminium foil mask with an aperture area of  $0.1 \text{ cm}^2$ .

**Table S1.** The photovoltaic properties of the DSSCs based on binary ionic liquid electrolyte under simulated AM 1.5 solar spectrum illumination at  $100 \text{ mW cm}^{-2}$  (average of five cells).

| Electrolyte | Composition                                                                                                                                     | $J_{sc}$<br>( $\text{mA cm}^{-2}$ ) | $V_{oc}$ (V)      | $FF$              | $PCE$<br>(%)    |
|-------------|-------------------------------------------------------------------------------------------------------------------------------------------------|-------------------------------------|-------------------|-------------------|-----------------|
| E 1         | 0.03 M $[\text{Co}(\text{MeIm-Bpy})\text{PF}_6]^{2+}$ , 0.02 M $\text{NaOBF}_4$ , 0.14 M $\text{GuNCS}$ , 0.5 M TBP in PMII:EMINCS = 13:7 (v:v) | $14.8 \pm 0.1$                      | $0.711 \pm 0.002$ | $0.679 \pm 0.008$ | $7.14 \pm 0.10$ |
| E 2         | 0.05 M $[\text{Co}(\text{MeIm-Bpy})\text{PF}_6]^{2+}$ , 0.02 M $\text{NaOBF}_4$ , 0.14 M $\text{GuNCS}$ , 0.5 M TBP in PMII:EMINCS = 13:7 (v:v) | $15.1 \pm 0.1$                      | $0.706 \pm 0.002$ | $0.691 \pm 0.007$ | $7.37 \pm 0.05$ |
| E 3         | 0.08 M $[\text{Co}(\text{MeIm-Bpy})\text{PF}_6]^{2+}$ , 0.02 M $\text{NaOBF}_4$ , 0.14 M $\text{GuNCS}$ , 0.5 M TBP in PMII:EMINCS = 13:7 (v:v) | $14.9 \pm 0.2$                      | $0.698 \pm 0.003$ | $0.672 \pm 0.008$ | $6.98 \pm 0.08$ |
| E 4         | 0.12 M $[\text{Co}(\text{MeIm-Bpy})\text{PF}_6]^{2+}$ , 0.02 M $\text{NaOBF}_4$ , 0.14 M $\text{GuNCS}$ , 0.5 M TBP in PMII:EMINCS = 13:7 (v:v) | $13.1 \pm 0.2$                      | $0.658 \pm 0.003$ | $0.671 \pm 0.006$ | $5.78 \pm 0.08$ |

## References:

- 1 S. M. Feldt, E. A. Gibson, E. Gabrielsson, L. Sun, G. Boschloo and A. Hagfeldt, *J. Am. Chem. Soc.* 2010, **132**, 16714–16724.
- 2 I. Gillaizeau-Gauthier, F. Odobel, M. Alebbi, R. Argazzi, E. Costa, C. A. Bignozzi, P. Qu and G. J. Meyer, *Inorg. Chem.* 2001, **40**, 6073–6079.
- 3 H. Seon Kim, S. B. Ko, I. H. Jang and N. G. Park, *Chem. Commun.*, 2011, **47**, 12637–12639.

10

15

20

25
